# Supplementary material for: Self-assembly of CdTe QDs into urchin-like microspheres by the assistance of a long-chain ionic liquid monolayer
Source: Royal Society of Chemistry journal article supplement (doi:10.1039/c1ce05086a), 2011-01-01
Supplement: c1ce05086a.pdf [file c1ce05086a.pdf]

## Self-assembly of CdTe QDs into urchin-like microspheres by the assist of long-chain ionic liquid monolayer

Hongchao Ma, Xiangtao Bai and Liqiang, Zheng\*

*Key Laboratory of Colloid and Interface Chemistry, Shandong University, Ministry of Education, Jinan, 250100, China.*

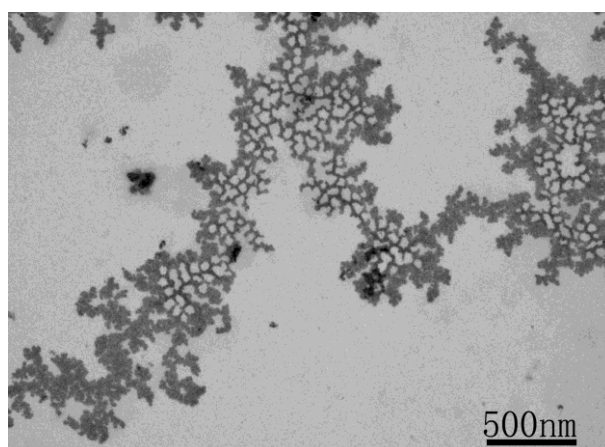

Figure S1. TEM image of the nanostructures formed in the bulk solution of the mixed aqueous solution of  $1.0 \times 10^{-3}$  mol/L  $C_{16}mimBr$  and  $1.0 \times 10^{-5}$  mol/L CdTe QDs aqueous solution.

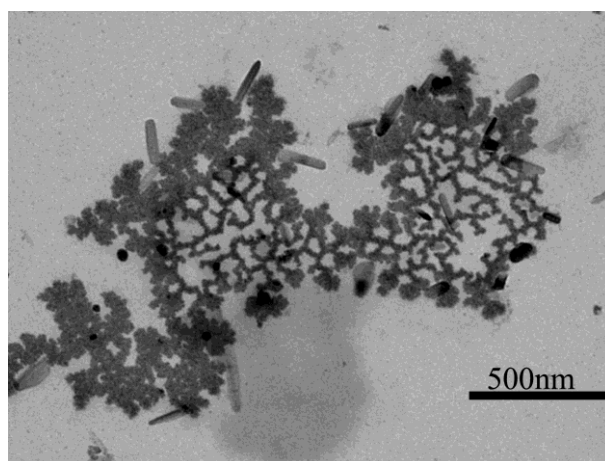

Figure S2. TEM image of the nanostructures formed at the air/water interface of the mixed aqueous solution of  $1.0 \times 10^{-3}$  mol/L  $C_{16}mimBr$  and  $1.0 \times 10^{-5}$  mol/L CdTe QDs aqueous solution.

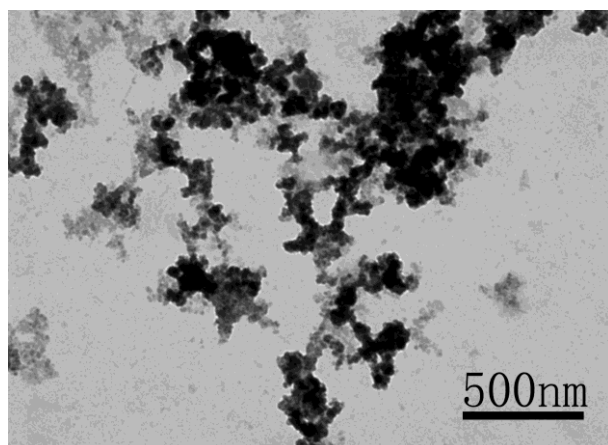

Figure S3. TEM image of nanostructures formed at the air/water interface when using CTAB instead of C<sub>16</sub>mimBr.
